# Supplementary material for: Increased dynamics in the 40–57 Ω-loop of the G41S variant of human cytochrome c promote its pro-apoptotic conformation
Source: PubMed Central journal article supplement (PMC4962053; doi:10.1038/srep30447), 2016-07-27
Supplement: srep30447-s1.pdf [file srep30447-s1.pdf]

## Supporting Information

### Increased dynamics in the 40-57 $\Omega$ -loop of the G41S variant of human cytochrome *c* promote its pro-apoptotic conformation

Andreas Ioannis Karsisiotis<sup>1</sup>, Oliver M. Deacon<sup>1</sup>, Michael T. Wilson<sup>1</sup>, Colin Macdonald<sup>2</sup>, Tharin M.A. Blumenschein<sup>2</sup>, Geoffrey R. Moore<sup>2</sup>, Jonathan A.R. Worrall<sup>1</sup>

<sup>1</sup>School of Biological Sciences, University of Essex, Wivenhoe Park, Colchester, CO4 3SQ, U.K.

<sup>2</sup>School of Chemistry, University of East Anglia, Norwich Research Park, NR4 7TJ, U.K.

## RESULTS

### *Dissolution of lyophilised H-ferricyt*

Lyophilised horse heart ferricyt has been reported to exhibit a change in electronic spectrum upon re-dissolving in buffer<sup>1</sup>. We confirmed that H-ferricyt generated the native protein in solution upon dissolution in buffer instantaneously through the measurement of UV-vis spectra, and through comparison of <sup>15</sup>N-HSQC spectra of H-ferricyt that had not been subjected to lyophilisation.

### *N<sub>3</sub><sup>-</sup> binding to WT and G41S H-ferricyt at alkaline pH*

In order to ascertain the influence of the presence of any alkaline form on N<sub>3</sub><sup>-</sup> binding stopped-flow experiments were performed at higher pH values, under which conditions the concentration of the alkaline conformer(s) is (are) increased. The optical transitions following mixing of H-ferricyt with N<sub>3</sub><sup>-</sup> revealed that the alkaline forms reacted significantly more slowly than the native form. Moreover, the rate constant for binding to the alkaline form was found to be close in value to that of the conversion of the Lys-bound H-ferricyt to the native Met80 bound form as revealed by independent pH jump experiments. For example (**Fig. S2**), at pH 9, N<sub>3</sub><sup>-</sup> (1 M) binding to G41S H-ferricyt was characterised by a small fast phase followed by a large slow phase with rate constants of 19 s<sup>-1</sup> and 0.086 s<sup>-1</sup>, respectively. The proportions of these phases as revealed by their amplitudes conformed to expectations for binding to the neutral and alkaline forms, respectively. The rate constant for the faster phase was [N<sub>3</sub><sup>-</sup>] dependent, whereas the slower rate constant was not. A similar pattern of results was obtained for WT H-ferricyt with rate constants of 6.1 s<sup>-1</sup> and 0.085 s<sup>-1</sup>, respectively. The interconversion of conformers of G41S H-ferricyt was further investigated by a pH-jump experiment in which the pH of a solution was rapidly changed from pH 7 to pH 9 when an optical transition was observed (**Fig. S3**), consistent with ligand exchange between Met80 and Lys and comprising a single exponential with a rate constant of 0.167 s<sup>-1</sup>, close to the value of 0.085 s<sup>-1</sup> for N<sub>3</sub><sup>-</sup> binding to the alkaline form of the protein (see above), but slightly higher due to a small

term involving the back reaction at this pH<sup>2</sup>. Because the rates of the processes involving the alkaline conformer(s) are so slow, and also because they are independent of N<sub>3</sub><sup>-</sup> binding, we conclude that they are not significant for the binding of N<sub>3</sub><sup>-</sup> to H-ferricyt under the conditions of Fig. 2 at pH 7.

### *Model free analysis*

The application of the Tjandra-Bax conditions to the data for the WT protein<sup>3</sup> led to the exclusion of E104 from the calculation of the overall correlation time ( $\tau_m$ ) estimate due to the lower than 0.65 NOE value. Residues 20, 23, 56 and 103 were excluded because they have elevated R<sub>2</sub>/R<sub>1</sub> ratios. Thus 89 residues were used for the calculation of rotational diffusion parameters from relaxation data. For G41S H-ferricyt, the C-terminal residue E104 was again excluded from the calculation of the overall  $\tau_m$  estimate due to its low NOE value. Residues 20, 23, 33, 41, 47, 53, 55, 58, 77 and 103 were excluded as they satisfied the conformational exchange criterion. Consequently, 81 residues were used for the calculation of rotational diffusion parameters from relaxation data.

H-ferricyt is an axially symmetric ellipsoid with approximate molecular dimensions of 34 x 30 x 24 Å. The principal components of the inertia tensors were determined using `pdbinertia` and are:  $D_{zz} = 1.0$ ,  $D_{xx} = 0.8535$ ,  $D_{yy} = 0.7013$  for WT H-ferricyt and  $D_{zz} = 1.0$ ,  $D_{xx} = 0.8474$ ,  $D_{yy} = 0.7061$  for G41S H-ferricyt. In both cases there is significant deviation from the spherical (isotropic) tensor. Relaxation data for both WT and G41S H-ferricyt were best treated with an axially symmetric model having  $D_{||} = D_{zz} = 1.0$  and  $D_{\perp} = 0.5(D_{xx} + D_{yy}) = 0.7774$  or  $0.77675$  for WT and G41S H-ferricyt, respectively. The diffusion anisotropy  $D_{||}/D_{\perp}$  for the axially symmetric tensor is 1.286 and 1.287 for WT and G41S H-ferricyt, respectively. The program `quadric_diffusion` further verified the axially symmetric tensor and provided local effective correlation times and tensor parameters based on relaxation data (R<sub>2</sub>/R<sub>1</sub> ratios through program `r2r1_tm`). The average  $\tau_m$  values used for the calculation of the rotational diffusion parameters for the WT H-ferricyt and its G41S variant were  $8.57 \pm 0.41$  ns and  $8.04 \pm 0.56$  ns, respectively. The diffusion anisotropy and Euler angles obtained through this approach were  $D_{||}/D_{\perp} = 0.88013$ ,  $\Theta = 1.30242^\circ$ ,  $\Phi = 3.00910^\circ$  and  $D_{||}/D_{\perp} = 0.87207$ ,  $\Theta = 0.89751^\circ$ ,  $\Phi = 0.34915^\circ$  for WT and G41S H-ferricyt, respectively. These values were used as the input of the FASTmodelfree calculations. Discrepancies between the value of  $D_{||}/D_{\perp}$  calculated from the structures (1.286 and 1.287) and the relaxation data (0.88013 and 0.87207) have been previously reported<sup>4</sup> and it is likely to be due to the differentiation between prolate and oblate approximations manifested by two minima in conformational space<sup>5</sup>. The

differences in  $D_{\parallel}/D_{\perp}$  values do not lead to significant differences in the identification of residues with chemical exchange contributions to their relaxation rates.

The spin relaxation data for WT and G41S H-ferricyt were best fitted with an axially symmetric rotational diffusion tensor having optimized diffusion anisotropy and Euler angle values of  $D_{\parallel}/D_{\perp} = 0.936$ ,  $\Phi = -23.189^{\circ}$ ,  $\Theta = -8.760^{\circ}$  and a rotational correlation time ( $\tau_m$ ) of 8.601 for WT H-ferricyt, and  $D_{\parallel}/D_{\perp} = 0.875$ ,  $\Phi = 99.689^{\circ}$ ,  $\Theta = 11.8^{\circ}$  and  $\tau_m$  of 7.994 ns for G41S H-ferricyt. A summary of the FASTmodelfree results obtained for WT (and G41S) H-ferricyt residues 8, 70, 73, 80 and 103 (59 and 103) were not assigned to any model, while 88 out of 93 residues (88 out of 90) were assigned to a specific model. For models 1 to 5, the distribution of residues was 55 (58), 10 (16), 10 (12), 5 (2) and 8 (2), respectively

## REFERENCES

- 1 Aviram, I. & Schejter, A. On the conformation change attending the hydration of lyophilized cytochrome c. *Biopolymers* **11**, 2141-2145, doi:10.1002/bip.1972.360111014 (1972).
- 2 Davis, L. A., Schejter, A. & Hess, G. P. Alkaline isomerization of oxidized cytochrome c. Equilibrium and kinetic measurements. *J Biol Chem* **249**, 2624-2632 (1974).
- 3 Tjandra, N., Feller, S. E., Pastor, R. W. & Bax, A. Rotational diffusion anisotropy of human ubiquitin from N-15 NMR relaxation. *Journal of the American Chemical Society* **117**, 12562-12566, doi:10.1021/ja00155a020 (1995).
- 4 Sahu, S. C., Bhuyan, A. K., Majumdar, A. & Udgaonkar, J. B. Backbone dynamics of barstar: a (15)N NMR relaxation study. *Proteins* **41**, 460-474 (2000).
- 5 Blackledge, M., Cordier, F., Dosset, P. & Marion, D. Precision and uncertainty in the characterization of anisotropic rotational diffusion by N-15 relaxation. *Journal of the American Chemical Society* **120**, 4538-4539, doi:10.1021/ja9742646 (1998).
- 6 Rajagopal, B. S. *et al.* The hydrogen-peroxide-induced radical behaviour in human cytochrome c-phospholipid complexes: implications for the enhanced pro-apoptotic activity of the G41S mutant. *Biochem J* **456**, 441-452, doi:10.1042/bj20130758 (2013).

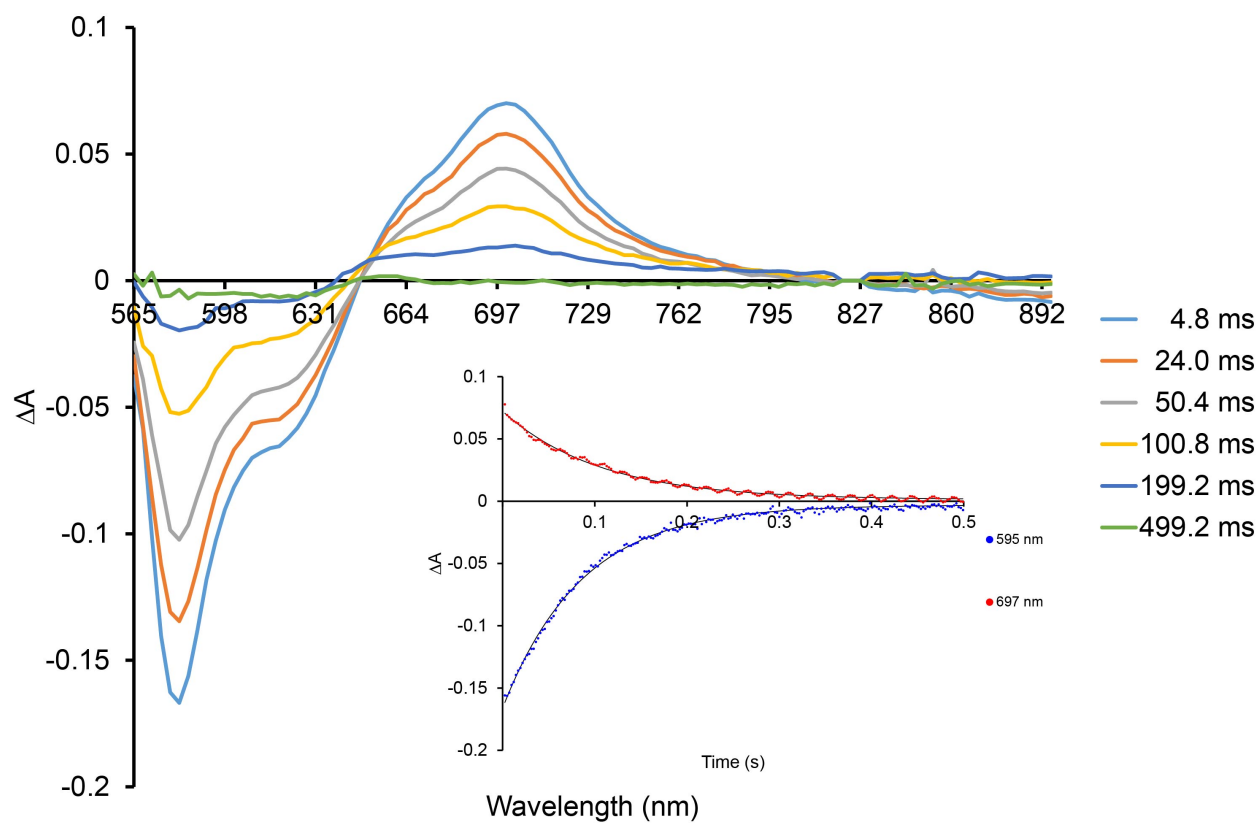

**Figure S1:**  $\text{N}^{3-}$  binding to G41S H-ferricyt at pH 7 and 25 °C. Cyt (425  $\mu\text{M}$  after mixing) was mixed with 0.5 M  $\text{N}^{3-}$  (after mixing) and difference spectra recorded from 565 to 895 nm. Bleaching of the 695 nm band is observed. The inset depicts time courses and their fits to single exponential at 697 nm (descending) and 595 (ascending).

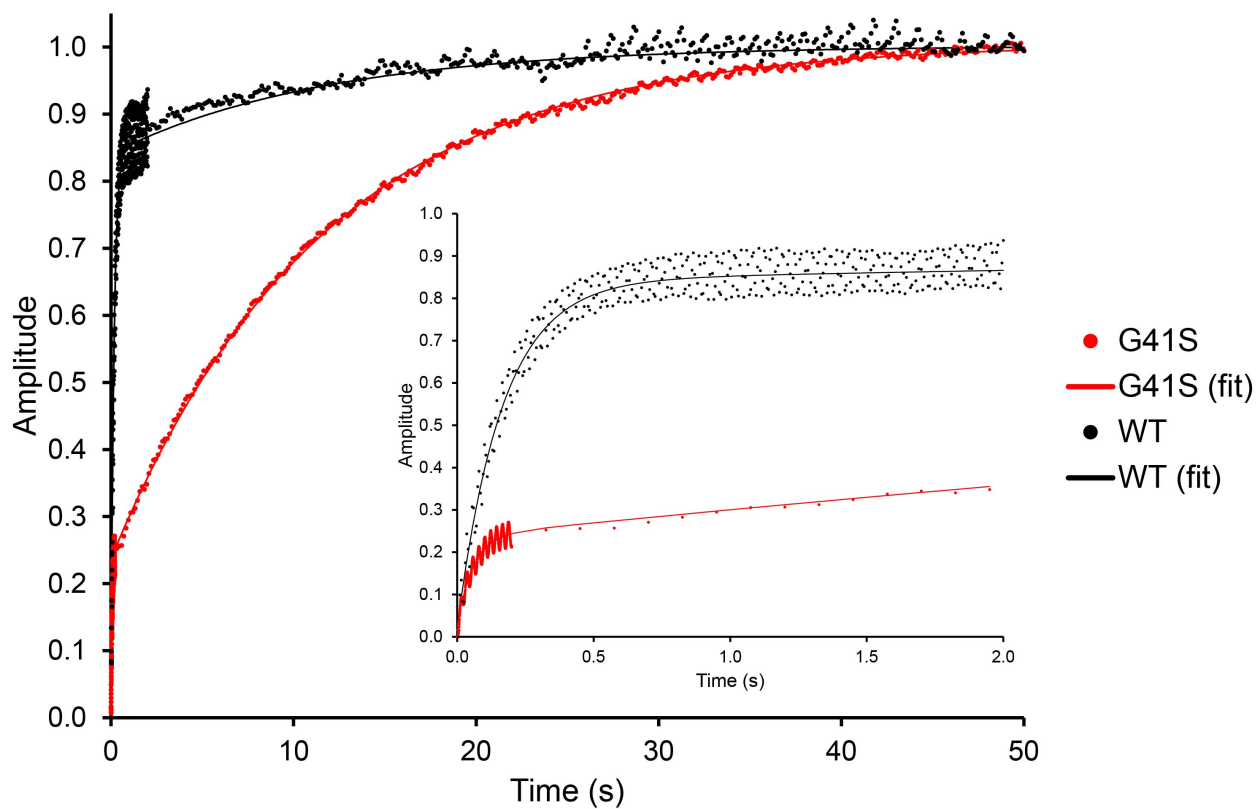

**Figure S2:**  $N^{3-}$  binding to WT and G41S H-ferricyt at pH 9 and 25 °C. Cyt (5  $\mu$ M after mixing) was mixed with 1 M  $N^{3-}$  (after mixing) and the time courses at 416 nm recorded. The inset shows an expanded view of the first two sec of the time courses.

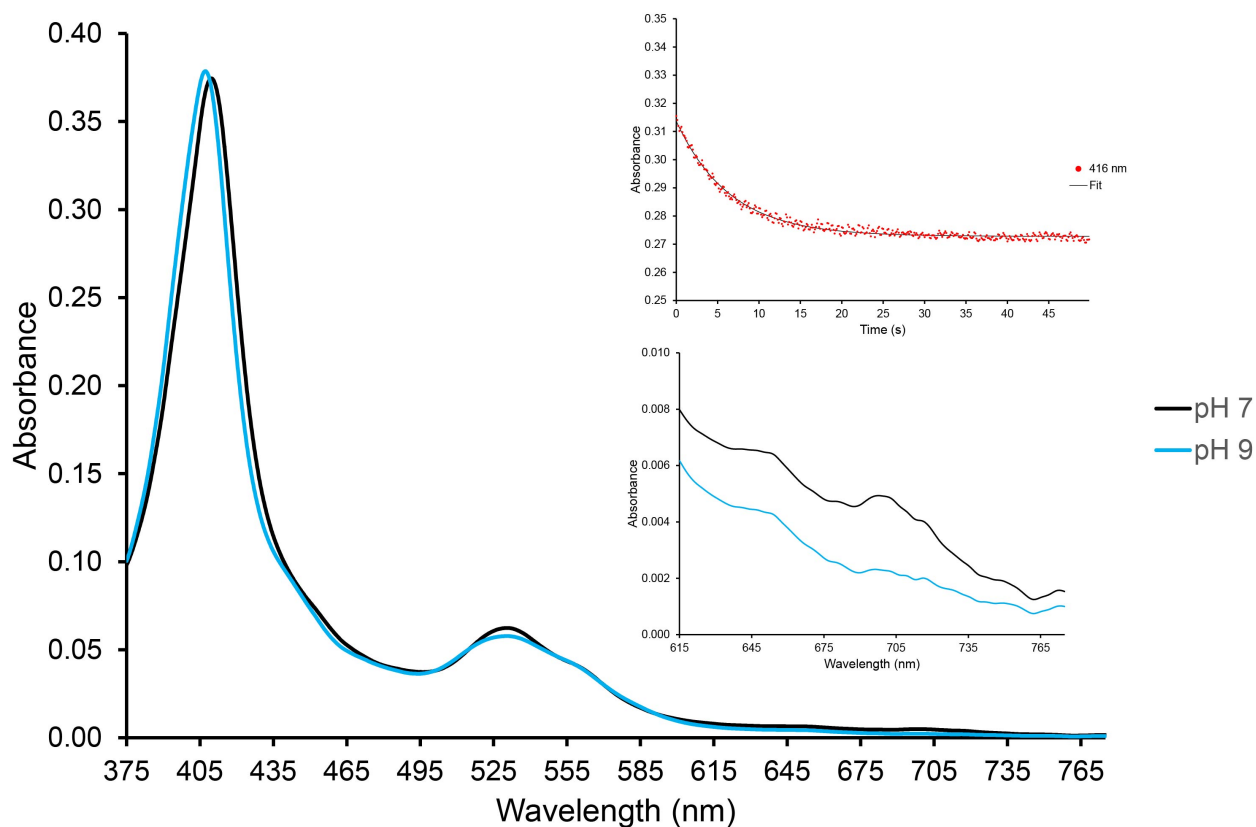

**Figure S3:** Stopped-flow analysis of pH jump (pH 7 to pH 9) of H-ferricyt at 25 °C. Spectra displayed were generated by global analysis of the full data set and depict the initial spectrum at pH 7 and the final spectrum at pH 9. Top inset illustrates a time course at 416 nm, fitted to a single exponential. Bottom inset shows an expanded spectrum illustrating the bleaching of the 695 nm band at pH 9. The protein (10  $\mu$ M) was prepared in 2 mM sodium phosphate, pH 7 and was mixed with 20 mM borate buffer, 100 mM NaCl giving a final pH of 9.

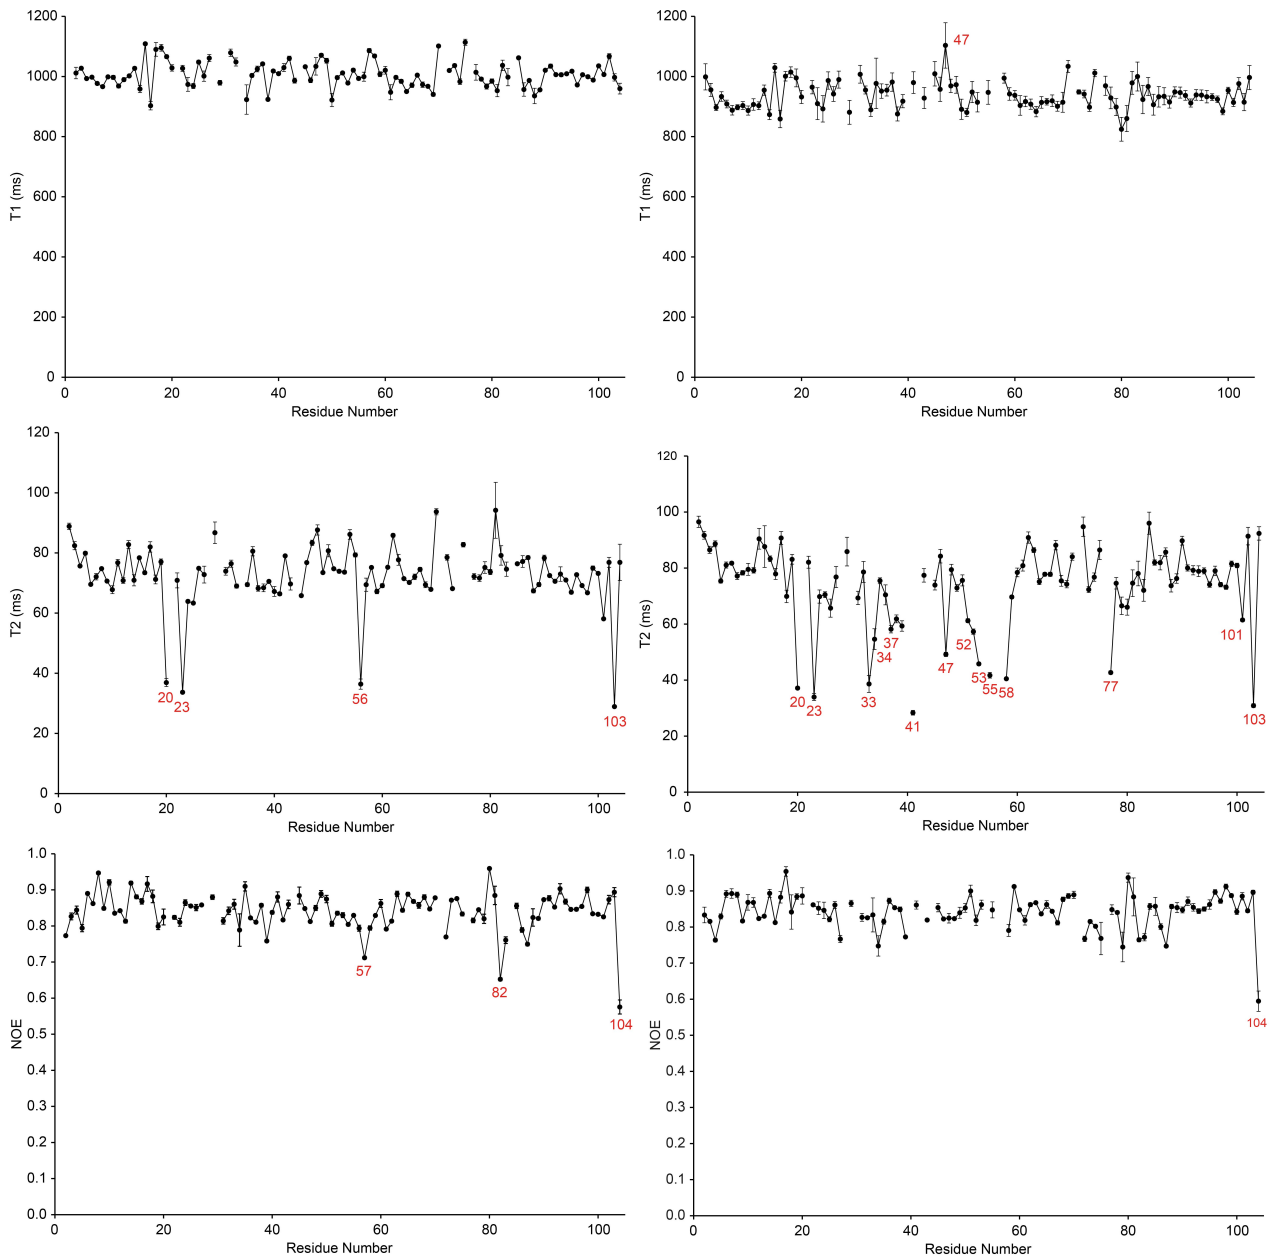

**Figure S4:**  $^{15}\text{N}$  Relaxation parameters for H-ferricyt WT (left) and the G41S variant (right) plotted against the residue number (pH 6.5, 15 °C).

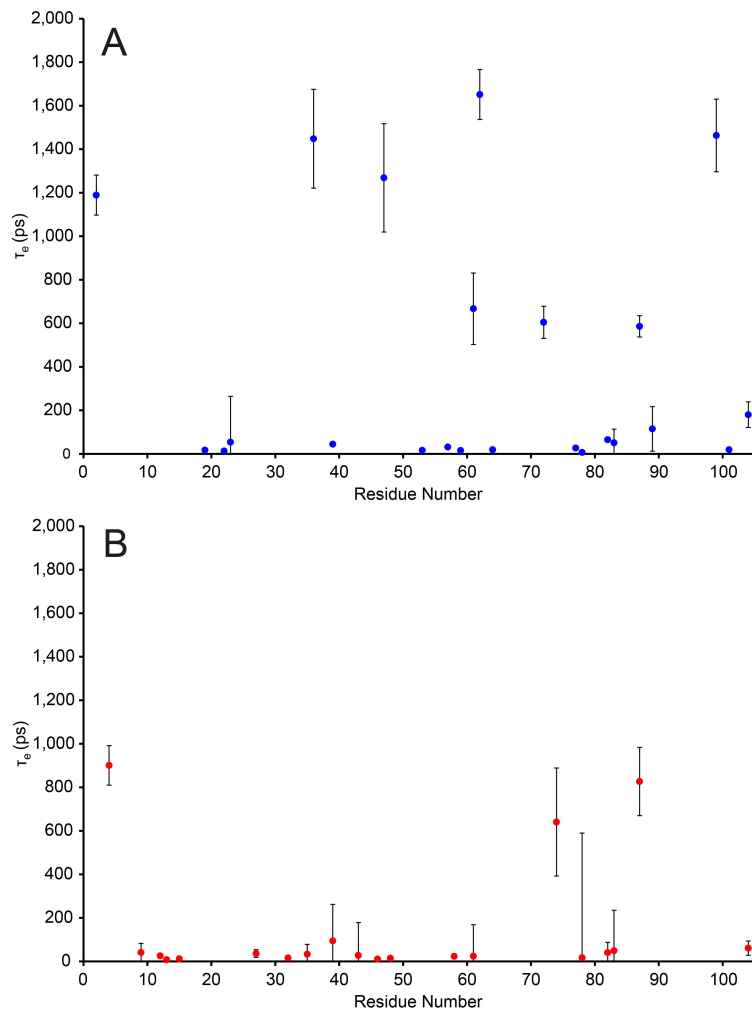

**Figure S5:** Model free parameters for H-ferricyt WT and the G41S variant (pH 6.5, 15 °C). Correlation time ( $\tau_c$ ) indicating internal motion for WT (A) and G41S (B).



**Table S1:** H/D exchange rates, calculated protection factors (log P), free energy of exchange ( $\Delta G_{\text{ex}}$ ) and proton occupancy values (Occ) for WT and G41S H-ferricyt (pH 6.5 and 15 °C). Numbers in red indicate negative  $k_{\text{ex}}$  values, with the proton occupancy values for these points 1.00 or over.

| Res. | WT                                  |      |                                   |                    | G41S                                |      |                                   |                    |
|------|-------------------------------------|------|-----------------------------------|--------------------|-------------------------------------|------|-----------------------------------|--------------------|
|      | $k_{\text{ex}}$ ( $\text{h}^{-1}$ ) | logP | $\Delta G_{\text{ex}}$ (kcal/mol) | Occ. ( $V_i/V_f$ ) | $k_{\text{ex}}$ ( $\text{h}^{-1}$ ) | logP | $\Delta G_{\text{HX}}$ (kcal/mol) | Occ. ( $V_i/V_f$ ) |
| G1   | -                                   | -    | -                                 | -                  | -                                   | -    | -                                 | -                  |
| D2   | -                                   | -    | -                                 | -                  | -                                   | -    | -                                 | -                  |
| V3   | -                                   | -    | -                                 | -                  | -                                   | -    | -                                 | -                  |
| E4   | -                                   | -    | -                                 | -                  | -                                   | -    | -                                 | -                  |
| K5   | -                                   | -    | -                                 | -                  | -                                   | -    | -                                 | -                  |
| G6   | 3.52E+00                            | 0.49 | 0.64                              | 0.22               | -                                   | -    | -                                 | -                  |
| K7   | 5.75E-02                            | 2.12 | 2.79                              | 0.08               | 9.07E-02                            | 1.92 | 2.53                              | 0.14               |
| K8   | 3.29E-01                            | 1.33 | 1.75                              | 0.06               | 5.15E-01                            | 1.13 | 1.50                              | 0.15               |
| I9   | 7.50E-03                            | 2.56 | 3.37                              | 0.61               | 8.46E-03                            | 2.50 | 3.30                              | 0.57               |
| F10  | 3.21E-03                            | 3.01 | 3.97                              | 0.79               | -4.91E-04                           | -    | -                                 | 1.09               |
| I11  | 1.64E-03                            | 3.18 | 4.19                              | 0.92               | 8.82E-04                            | 3.45 | 4.55                              | 0.97               |
| M12  | 2.00E-01                            | 1.35 | 1.78                              | 0.26               | 2.74E-01                            | 1.22 | 1.60                              | 0.16               |
| K13  | 1.36E-03                            | 3.71 | 4.89                              | 0.92               | 1.27E-04                            | 4.74 | 6.24                              | 1.00               |
| C14  | 1.30E-02                            | 3.13 | 4.13                              | 0.47               | 1.20E-02                            | 3.16 | 4.17                              | 0.46               |
| S15  | 4.93E+00                            | 0.66 | 0.87                              | 0.42               | -                                   | -    | -                                 | -                  |
| Q16  | -                                   | -    | -                                 | -                  | -                                   | -    | -                                 | -                  |
| C17  | -                                   | -    | -                                 | -                  | -                                   | -    | -                                 | -                  |
| H18  | 2.39E-01                            | 2.23 | 2.94                              | 0.10               | 2.58E-01                            | 2.20 | 2.90                              | 0.27               |
| T19  | 1.91E-01                            | 1.98 | 2.60                              | 0.08               | 1.46E-01                            | 2.09 | 2.75                              | 0.18               |
| V20  | -                                   | -    | -                                 | -                  | -                                   | -    | -                                 | -                  |
| E21  | -                                   | -    | -                                 | -                  | -                                   | -    | -                                 | -                  |
| K22  | -                                   | -    | -                                 | -                  | -                                   | -    | -                                 | -                  |
| G23  | -                                   | -    | -                                 | -                  | -                                   | -    | -                                 | -                  |
| G24  | -                                   | -    | -                                 | -                  | -                                   | -    | -                                 | -                  |
| K25  | -                                   | -    | -                                 | -                  | -                                   | -    | -                                 | -                  |
| H26  | -                                   | -    | -                                 | -                  | -                                   | -    | -                                 | -                  |
| K27  | 1.68E+00                            | 1.05 | 1.38                              | 0.09               | -                                   | -    | -                                 | -                  |
| T28  | -                                   | -    | -                                 | -                  | -                                   | -    | -                                 | -                  |
| G29  | 4.62E-01                            | 1.42 | 1.87                              | 0.09               | 8.39E-01                            | 1.16 | 1.53                              | 0.40               |
| P30  | -                                   | -    | -                                 | -                  | -                                   | -    | -                                 | -                  |
| N31  | -                                   | -    | -                                 | -                  | -                                   | -    | -                                 | -                  |
| L32  | 2.87E-03                            | 3.18 | 4.20                              | 0.84               | 7.65E-03                            | 2.76 | 3.64                              | 0.57               |
| H33  | 1.05E-02                            | 3.13 | 4.13                              | 0.52               | 1.63E-02                            | 2.94 | 3.88                              | 0.35               |
| G34  | 2.41E-01                            | 2.08 | 2.74                              | 0.17               | -                                   | -    | -                                 | -                  |
| L35  | 2.04E-02                            | 2.24 | 2.95                              | 0.57               | 5.56E-02                            | 1.81 | 2.38                              | 0.14               |
| F36  | 1.86E-02                            | 2.26 | 2.98                              | 0.31               | 3.23E-02                            | 2.02 | 2.66                              | 0.17               |
| G37  | 4.41E-02                            | 2.35 | 3.10                              | 0.10               | 3.33E-01                            | 1.47 | 1.94                              | 0.38               |
| R38  | 1.25E-02                            | 2.85 | 3.76                              | 0.44               | 1.76E+00                            | 0.70 | 0.93                              | 0.52               |
| K39  | -                                   | 0.43 | -                                 | 0.13-              | -                                   | -    | -                                 | -                  |
| T40  | 9.00E-02                            | 1.87 | 2.47                              | 0.07               | -                                   | -    | -                                 | -                  |
| G41S | 1.70E-01                            | 1.85 | 2.44                              | 0.12               | -                                   | -    | -                                 | -                  |
| Q42  | 1.57E-01                            | 1.74 | 2.29                              | 0.08               | -                                   | -    | -                                 | -                  |
| A43  | 1.72E+00                            | 0.68 | 0.90                              | 0.08               | -                                   | -    | -                                 | -                  |
| P44  | -                                   | -    | -                                 | -                  | -                                   | -    | -                                 | -                  |
| G45  | 1.23E+00                            | 0.73 | 0.96                              | 0.13               | 7.44E-01                            | 0.95 | 1.25                              | 0.47               |
| Y46  | -                                   | -    | -                                 | -                  | -                                   | -    | -                                 | -                  |
| S47  | -                                   | -    | -                                 | -                  | -                                   | -    | -                                 | -                  |
| Y48  | -                                   | -    | -                                 | -                  | -                                   | -    | -                                 | -                  |
| T49  | 1.22E+00                            | 0.70 | 0.92                              | 0.09               | -                                   | -    | -                                 | -                  |
| A50  | -                                   | -    | -                                 | -                  | -                                   | -    | -                                 | -                  |
| A51  | 1.97E-01                            | 1.50 | 1.98                              | 0.09               | -                                   | -    | -                                 | -                  |
| N52  | 7.55E-01                            | 1.22 | 1.60                              | 0.07               | -                                   | -    | -                                 | -                  |

|      |          |       |       |      |           |      |      |      |
|------|----------|-------|-------|------|-----------|------|------|------|
| K53  | 9.01E-01 | 1.01  | 1.33  | 0.10 | -         | -    | -    | -    |
| N54  | 1.80E+00 | 0.91  | 1.20  | 0.10 | -         | -    | -    | -    |
| K55  | -        | -     | -     | -    | -         | -    | -    | -    |
| G56  | -        | -     | -     | -    | -         | -    | -    | -    |
| I57  | 1.24E-01 | 1.37  | 1.80  | 0.07 | -         | -    | -    | -    |
| I58  | 3.28E+00 | -0.29 | -0.39 | 0.17 | 1.35E+00  | 0.09 | 0.12 | 0.69 |
| W59  | 2.36E-03 | 3.04  | 4.01  | 0.84 | 9.48E-02  | 1.44 | 1.89 | 0.21 |
| G60  | 4.66E-03 | 3.23  | 4.25  | 0.74 | 1.32E-02  | 2.78 | 3.66 | 0.40 |
| E61  | -        | -     | -     | -    | -         | -    | -    | -    |
| D62  | -        | -     | -     | -    | -         | -    | -    | -    |
| T63  | -        | -     | -     | -    | -         | -    | -    | -    |
| L64  | 1.58E-03 | 3.37  | 4.44  | 0.91 | 2.40E-03  | 3.19 | 4.20 | 0.87 |
| M65  | 4.78E-03 | 2.99  | 3.94  | 0.74 | 6.30E-03  | 2.87 | 3.78 | 0.68 |
| E66  | 2.13E-01 | 1.68  | 2.22  | 0.07 | 3.61E-01  | 1.45 | 1.91 | 0.19 |
| Y67  | 4.67E-03 | 3.20  | 4.22  | 0.77 | 6.88E-03  | 3.03 | 4.00 | 0.67 |
| L68  | 8.23E-04 | 3.56  | 4.70  | 0.95 | -9.31E-04 | -    | -    | 1.09 |
| E69  | 8.48E-04 | 3.89  | 5.12  | 0.91 | 1.79E-03  | 3.56 | 4.70 | 0.92 |
| N70  | 1.61E-01 | 2.12  | 2.79  | 0.05 | 2.80E-01  | 1.88 | 2.48 | 0.14 |
| P71  | -        | -     | -     | -    | -         | -    | -    | -    |
| K72  | -        | -     | -     | -    | -         | -    | -    | -    |
| K73  | 4.66E-01 | 1.18  | 1.55  | 0.33 | 2.05E+00  | 0.54 | 0.71 | 0.28 |
| Y74  | 1.38E-02 | 2.57  | 3.39  | 0.44 | 1.29E-01  | 1.60 | 2.11 | 0.20 |
| I75  | 4.34E-03 | 2.75  | 3.63  | 0.75 | 6.74E-02  | 1.56 | 2.06 | 0.18 |
| P76  | -        | -     | -     | -    | -         | -    | -    | -    |
| G77  | -        | -     | -     | -    | -         | -    | -    | -    |
| T78  | 4.55E+00 | 0.20  | 0.27  | 0.28 | -         | -    | -    | -    |
| K79  | 9.35E-01 | 0.92  | 1.22  | 0.14 | -         | -    | -    | -    |
| M80  | 1.05E+00 | 0.85  | 1.11  | 0.13 | -         | -    | -    | -    |
| I81  | -        | -     | -     | -    | -         | -    | -    | -    |
| F82  | -        | -     | -     | -    | -         | -    | -    | -    |
| V83  | -        | -     | -     | -    | -         | -    | -    | -    |
| G84  | -        | -     | -     | -    | -         | -    | -    | -    |
| I85  | 2.90E-01 | 1.00  | 1.32  | 0.09 | 2.56E-01  | 1.05 | 1.39 | 0.20 |
| K86  | -        | -     | -     | -    | -         | -    | -    | -    |
| K87  | -        | -     | -     | -    | -         | -    | -    | -    |
| K88  | -        | -     | -     | -    | -         | -    | -    | -    |
| E89  | -        | -     | -     | -    | -         | -    | -    | -    |
| E90  | 5.60E+00 | 0.43  | 0.57  | 0.26 | -         | -    | -    | -    |
| R91  | 7.08E-03 | 3.23  | 4.26  | 0.67 | 5.50E-03  | 3.34 | 4.40 | 0.72 |
| A92  | 1.20E-02 | 2.85  | 3.76  | 0.67 | 1.21E-02  | 2.85 | 3.75 | 0.45 |
| D93  | 2.08E-02 | 2.90  | 3.82  | 0.25 | 2.09E-02  | 2.89 | 3.81 | 0.26 |
| L94  | 9.07E-04 | 3.85  | 5.08  | 0.99 | -1.33E-03 | -    | -    | 1.12 |
| I95  | 3.10E-03 | 2.74  | 3.61  | 0.79 | 1.78E-03  | 2.98 | 3.93 | 0.91 |
| A96  | 1.52E-03 | 3.48  | 4.58  | 0.91 | -4.18E-04 | -    | -    | 1.05 |
| Y97  | 1.90E-03 | 3.36  | 4.42  | 0.91 | -1.62E-04 | -    | -    | 1.02 |
| L98  | 2.15E-03 | 3.15  | 4.15  | 0.86 | -5.25E-04 | -    | -    | 1.03 |
| K99  | 1.89E-04 | 4.37  | 5.76  | 0.99 | -1.68E-03 | -    | -    | 1.13 |
| K100 | 5.77E-02 | 2.09  | 2.75  | 0.05 | 5.20E-02  | 2.13 | 2.81 | 0.13 |
| A101 | 7.25E-02 | 2.01  | 2.65  | 0.06 | 8.19E-02  | 1.96 | 2.58 | 0.16 |
| T102 | 2.50E-01 | 1.36  | 1.79  | 0.05 | 2.98E-01  | 1.28 | 1.69 | 0.17 |
| N103 | 3.79E+00 | 0.63  | 0.84  | 0.15 | -         | -    | -    | -    |
| E104 | -        | -     | -     | -    | -         | -    | -    | -    |

**Table S2:** Free energies of denaturation in water ( $\text{kcal mol}^{-1}$ ) [and  $m$  values,  $\text{kcal mol}^{-1} \text{M}^{-1}$ ] for WT H-ferricyt and the G41S variant.

| Protein | pH 7, 20 °C <sup>6</sup> | pH 6.5, 15 °C (this work) |
|---------|--------------------------|---------------------------|
| WT      | 10.5 (0.2) [4.4 (0.4)]   | 10.1 (0.4) [3.9 (0.5)]    |
| G41S    | 7.9 (0.3) [3.0 (0.3)]    | 6.8 (0.5) [3.0 (0.3)]     |

**Table S3:** Backbone dynamic parameters for H-ferricyt WT and G41S variant derived from Model-free analysis.

| Res. | WT |                |                                 |                             |                                   |                     |                      |                                    |                       |        | G41S |                |                                 |                             |                                   |                     |                      |                                    |                       |        |  |
|------|----|----------------|---------------------------------|-----------------------------|-----------------------------------|---------------------|----------------------|------------------------------------|-----------------------|--------|------|----------------|---------------------------------|-----------------------------|-----------------------------------|---------------------|----------------------|------------------------------------|-----------------------|--------|--|
|      | M. | S <sup>2</sup> | S <sup>2</sup> <sub>error</sub> | S <sup>2</sup> <sub>f</sub> | S <sup>2</sup> <sub>f error</sub> | τ <sub>e</sub> (ps) | τ <sub>e error</sub> | R <sub>ex</sub> (s <sup>-1</sup> ) | R <sub>ex error</sub> | S.S.E. | M.   | S <sup>2</sup> | S <sup>2</sup> <sub>error</sub> | S <sup>2</sup> <sub>f</sub> | S <sup>2</sup> <sub>f error</sub> | τ <sub>e</sub> (ps) | τ <sub>e error</sub> | R <sub>ex</sub> (s <sup>-1</sup> ) | R <sub>ex error</sub> | S.S.E. |  |
| G1   |    |                |                                 |                             |                                   |                     |                      |                                    |                       |        |      |                |                                 |                             |                                   |                     |                      |                                    |                       |        |  |
| D2   | 5  | 0.756          | 0.011                           | 0.844                       | 0.009                             | 1189.20             | 92.13                |                                    |                       | 0.00   | 1    | 0.798          | 0.015                           |                             |                                   |                     |                      |                                    |                       | 3.83   |  |
| V3   | 1  | 0.899          | 0.003                           |                             |                                   |                     |                      |                                    |                       | 21.32  | 1    | 0.85           | 0.011                           |                             |                                   |                     |                      |                                    |                       | 183.80 |  |
| E4   | 1  | 0.932          | 0.002                           |                             |                                   |                     |                      |                                    |                       | 11.59  | 5    | 0.846          | 0.015                           | 0.924                       | 0.009                             | 900.71              | 90.87                |                                    |                       | 0.00   |  |
| K5   | 1  | 0.92           | 0.003                           |                             |                                   |                     |                      |                                    |                       | 91.99  | 1    | 0.867          | 0.008                           |                             |                                   |                     |                      |                                    |                       | 36.09  |  |
| G6   | 1  | 0.97           | 0.003                           |                             |                                   |                     |                      |                                    |                       | 165.40 | 1    | 0.986          | 0.007                           |                             |                                   |                     |                      |                                    |                       | 33.47  |  |
| K7   | 1  | 0.965          | 0.004                           |                             |                                   |                     |                      |                                    |                       | 121.20 | 1    | 0.948          | 0.01                            |                             |                                   |                     |                      |                                    |                       | 11.04  |  |
| K8   |    |                |                                 |                             |                                   |                     |                      |                                    |                       | 0.00   | 1    | 0.934          | 0.005                           |                             |                                   |                     |                      |                                    |                       | 48.25  |  |
| I9   | 3  | 0.928          | 0.006                           |                             |                                   |                     |                      | 0.93                               | 0.12                  | 1.05   | 2    | 0.96           | 0.01                            |                             |                                   | 40.82               | 42.23                |                                    |                       | 1.75   |  |
| F10  | 1  | 0.964          | 0.006                           |                             |                                   |                     |                      |                                    |                       | 98.79  | 1    | 0.97           | 0.009                           |                             |                                   |                     |                      |                                    |                       | 0.82   |  |
| I11  | 1  | 0.936          | 0.005                           |                             |                                   |                     |                      |                                    |                       | 104.80 | 1    | 0.949          | 0.016                           |                             |                                   |                     |                      |                                    |                       | 1.58   |  |
| M12  | 1  | 0.93           | 0.003                           |                             |                                   |                     |                      |                                    |                       | 34.24  | 2    | 0.95           | 0.009                           |                             |                                   | 25.35               | 6.79                 |                                    |                       | 0.23   |  |
| K13  | 1  | 0.897          | 0.005                           |                             |                                   |                     |                      |                                    |                       | 85.64  | 2    | 0.883          | 0.014                           |                             |                                   | 7.80                | 1.42                 |                                    |                       | 1.84   |  |
| C14  | 1  | 0.982          | 0.011                           |                             |                                   |                     |                      |                                    |                       | 194.20 | 1    | 0.989          | 0.014                           |                             |                                   |                     |                      |                                    |                       | 17.42  |  |
| S15  | 1  | 0.863          | 0.003                           |                             |                                   |                     |                      |                                    |                       | 33.53  | 2    | 0.866          | 0.008                           |                             |                                   | 11.87               | 0.94                 |                                    |                       | 0.13   |  |
| Q16  | 1  | 0.948          | 0.006                           |                             |                                   |                     |                      |                                    |                       | 52.27  | 1    | 0.964          | 0.019                           |                             |                                   |                     |                      |                                    |                       | 11.98  |  |
| C17  | 1  | 0.852          | 0.013                           |                             |                                   |                     |                      |                                    |                       | 9.76   | 1    | 0.859          | 0.012                           |                             |                                   |                     |                      |                                    |                       | 65.81  |  |
| H18  | 3  | 0.87           | 0.008                           |                             |                                   |                     |                      | 1.27                               | 0.32                  | 2.64   | 3    | 0.883          | 0.015                           |                             |                                   |                     |                      | 2.11                               | 0.49                  | 0.05   |  |
| T19  | 2  | 0.881          | 0.005                           |                             |                                   | 17.41               | 2.91                 |                                    |                       | 0.06   | 1    | 0.884          | 0.015                           |                             |                                   |                     |                      |                                    |                       | 17.03  |  |
| V20  | 3  | 0.925          | 0.009                           |                             |                                   |                     |                      | 13.51                              | 1.00                  | 1.68   | 3    | 0.959          | 0.023                           |                             |                                   |                     |                      | 13.71                              | 0.50                  | 2.24   |  |
| E21  |    |                |                                 |                             |                                   |                     |                      |                                    |                       |        |      |                |                                 |                             |                                   |                     |                      |                                    |                       |        |  |
| K22  | 2  | 0.911          | 0.009                           |                             |                                   | 13.05               | 2.69                 |                                    |                       | 3.68   | 1    | 0.904          | 0.015                           |                             |                                   |                     |                      |                                    |                       | 21.97  |  |
| G23  | 4  | 0.965          | 0.018                           |                             |                                   | 53.97               | 210.19               | 15.53                              | 0.50                  | 0.00   | 3    | 0.986          | 0.038                           |                             |                                   |                     |                      | 15.82                              | 1.20                  | 0.00   |  |
| G24  | 3  | 0.963          | 0.008                           |                             |                                   |                     |                      | 1.80                               | 0.17                  | 2.22   | 1    | 1              | 0.016                           |                             |                                   |                     |                      |                                    |                       | 1.11   |  |
| K25  | 3  | 0.909          | 0.006                           |                             |                                   |                     |                      | 2.43                               | 0.10                  | 2.13   | 1    | 1              | 0.008                           |                             |                                   |                     |                      |                                    |                       | 35.05  |  |
| H26  | 1  | 0.912          | 0.004                           |                             |                                   |                     |                      |                                    |                       | 6.44   | 3    | 0.957          | 0.023                           |                             |                                   |                     |                      | 1.94                               | 0.81                  | 0.74   |  |
| K27  | 1  | 0.889          | 0.009                           |                             |                                   |                     |                      |                                    |                       | 22.14  | 2    | 0.899          | 0.022                           |                             |                                   | 36.13               | 17.56                |                                    |                       | 1.06   |  |
| T28  |    |                |                                 |                             |                                   |                     |                      |                                    |                       |        |      |                |                                 |                             |                                   |                     |                      |                                    |                       |        |  |
| G29  | 1  | 0.962          | 0.008                           |                             |                                   |                     |                      |                                    |                       | 49.41  | 1    | 0.938          | 0.033                           |                             |                                   |                     |                      |                                    |                       | 7.21   |  |
| P30  |    |                |                                 |                             |                                   |                     |                      |                                    |                       |        |      |                |                                 |                             |                                   |                     |                      |                                    |                       |        |  |
| N31  | 1  | 0.889          | 0.008                           |                             |                                   |                     |                      |                                    |                       | 28.89  | 1    | 0.941          | 0.022                           |                             |                                   |                     |                      |                                    |                       | 18.85  |  |
| L32  | 1  | 0.901          | 0.009                           |                             |                                   |                     |                      |                                    |                       | 2.17   | 2    | 0.929          | 0.012                           |                             |                                   | 16.01               | 3.63                 |                                    |                       | 0.01   |  |
| H33  |    |                |                                 |                             |                                   |                     |                      |                                    |                       |        | 3    | 1              | 0.013                           |                             |                                   |                     |                      | 12.23                              | 2.03                  | 0.16   |  |
| G34  |    |                |                                 |                             |                                   |                     |                      |                                    |                       |        | 1    | 1              | 0.035                           |                             |                                   |                     |                      |                                    |                       | 28.39  |  |
| L35  | 1  | 0.958          | 0.005                           |                             |                                   |                     |                      |                                    |                       | 31.30  | 2    | 0.95           | 0.011                           |                             |                                   | 32.87               | 45.20                |                                    |                       | 0.32   |  |
| F36  | 5  | 0.835          | 0.02                            | 0.878                       | 0.012                             | 1448.30             | 227.10               |                                    |                       | 0.00   | 1    | 0.943          | 0.017                           |                             |                                   |                     |                      |                                    |                       | 11.37  |  |
| G37  | 1  | 0.921          | 0.004                           |                             |                                   |                     |                      |                                    |                       | 178.00 | 3    | 0.901          | 0.028                           |                             |                                   |                     |                      | 4.92                               | 0.53                  | 0.74   |  |
| R38  | 1  | 1              | 0.003                           |                             |                                   |                     |                      |                                    |                       | 3.19   | 1    | 1              | 0.011                           |                             |                                   |                     |                      |                                    |                       | 12.76  |  |
| K39  | 4  | 0.911          | 0.004                           |                             |                                   | 44.14               | 2.80                 | 0.80                               | 0.10                  | 0.00   | 4    | 0.956          | 0.016                           |                             |                                   | 94.55               | 167.37               | 3.64                               | 0.57                  | 0.00   |  |

|      |   |       |       |       |       |         |        |      |       |        |   |       |       |  |  |        |        |       |        |      |
|------|---|-------|-------|-------|-------|---------|--------|------|-------|--------|---|-------|-------|--|--|--------|--------|-------|--------|------|
| T40  | 1 | 0.94  | 0.004 |       |       |         |        |      | 22.01 |        |   |       |       |  |  |        |        |       |        |      |
| G41S | 3 | 0.925 | 0.012 |       |       |         |        | 1.46 | 0.22  | 3.63   | 3 | 0.92  | 0.034 |  |  |        | 22.60  | 1.10  | 0.56   |      |
| Q42  | 1 | 0.875 | 0.004 |       |       |         |        |      |       | 135.00 |   |       |       |  |  |        |        |       |        |      |
| A43  | 1 | 0.963 | 0.007 |       |       |         |        |      |       | 0.75   | 2 | 0.947 | 0.022 |  |  | 27.47  | 150.90 |       | 0.00   |      |
| P44  |   |       |       |       |       |         |        |      |       |        |   |       |       |  |  |        |        |       |        |      |
| G45  | 3 | 0.922 | 0.003 |       |       |         |        | 1.66 | 0.11  | 1.76   | 3 | 0.875 | 0.036 |  |  |        | 1.63   | 0.59  | 0.02   |      |
| Y46  | 1 | 0.917 | 0.003 |       |       |         |        |      |       | 15.62  | 2 | 0.886 | 0.021 |  |  | 10.79  | 2.87   |       | 0.75   |      |
| S47  | 5 | 0.815 | 0.01  | 0.862 | 0.01  | 1268.60 | 248.72 |      |       | 0.00   | 1 | 1     | 0.013 |  |  |        |        |       | 118.90 |      |
| Y48  | 1 | 0.871 | 0.005 |       |       |         |        |      |       | 35.55  | 2 | 0.915 | 0.015 |  |  | 14.46  | 3.49   |       | 0.03   |      |
| T49  | 1 | 0.92  | 0.004 |       |       |         |        |      |       | 22.91  | 3 | 0.914 | 0.026 |  |  |        | 1.22   | 0.42  | 0.70   |      |
| A50  | 1 | 0.93  | 0.015 |       |       |         |        |      |       | 22.33  | 1 | 0.989 | 0.016 |  |  |        |        |       | 0.71   |      |
| A51  | 1 | 0.935 | 0.003 |       |       |         |        |      |       | 51.02  | 1 | 1     | 0.006 |  |  |        |        |       | 117.20 |      |
| N52  | 1 | 0.925 | 0.004 |       |       |         |        |      |       | 25.51  | 1 | 1     | 0.011 |  |  |        |        |       | 78.70  |      |
| K53  | 2 | 0.944 | 0.004 |       |       | 16.03   | 5.05   |      |       | 1.96   | 3 | 0.952 | 0.031 |  |  |        | 9.10   | 0.50  | 0.65   |      |
| N54  | 1 | 0.902 | 0.005 |       |       |         |        |      |       | 173.00 |   |       |       |  |  |        |        |       |        |      |
| K55  | 1 | 0.924 | 0.004 |       |       |         |        |      |       | 150.10 | 3 | 0.951 | 0.036 |  |  |        | 10.77  | 0.76  | 0.05   |      |
| G56  | 1 | 0.971 | 0.014 |       |       |         |        |      |       | 162.80 |   |       |       |  |  |        |        |       |        |      |
| I57  | 4 | 0.828 | 0.005 |       |       | 31.30   | 1.38   | 2.46 | 0.47  | 0.00   |   |       |       |  |  |        |        |       |        |      |
| I58  | 1 | 0.906 | 0.003 |       |       |         |        |      |       | 126.30 | 4 | 0.89  | 0.015 |  |  | 23.12  | 7.06   | 12.37 | 0.34   | 0.00 |
| W59  | 4 | 0.937 | 0.008 |       |       | 15.52   | 2.41   | 1.15 | 0.20  | 0.00   |   |       |       |  |  |        |        |       | 0.00   |      |
| G60  | 3 | 0.924 | 0.012 |       |       |         |        | 1.03 | 0.21  | 0.69   | 1 | 0.939 | 0.012 |  |  |        |        |       | 2.10   |      |
| E61  | 5 | 0.923 | 0.007 | 0.961 | 0.008 | 666.72  | 164.63 |      |       | 0.00   | 2 | 0.936 | 0.019 |  |  | 23.57  | 144.63 |       | 0.19   |      |
| D62  | 5 | 0.79  | 0.007 | 0.857 | 0.004 | 1651.70 | 114.65 |      |       | 0.00   | 1 | 0.885 | 0.013 |  |  |        |        |       | 35.76  |      |
| T63  | 1 | 0.951 | 0.006 |       |       |         |        |      |       | 34.04  | 1 | 0.88  | 0.008 |  |  |        |        |       | 47.65  |      |
| L64  | 2 | 0.976 | 0.003 |       |       | 19.16   | 9.00   |      |       | 1.35   | 1 | 0.996 | 0.008 |  |  |        |        |       | 16.93  |      |
| M65  | 1 | 0.976 | 0.005 |       |       |         |        |      |       | 54.40  | 1 | 0.956 | 0.007 |  |  |        |        |       | 0.95   |      |
| E66  | 1 | 0.938 | 0.003 |       |       |         |        |      |       | 13.36  | 1 | 0.952 | 0.007 |  |  |        |        |       | 6.46   |      |
| Y67  | 1 | 0.945 | 0.007 |       |       |         |        |      |       | 6.17   | 1 | 0.889 | 0.013 |  |  |        |        |       | 58.73  |      |
| L68  | 1 | 0.962 | 0.004 |       |       |         |        |      |       | 28.98  | 1 | 0.97  | 0.014 |  |  |        |        |       | 18.02  |      |
| E69  | 1 | 1     | 0.002 |       |       |         |        |      |       | 13.07  | 1 | 0.983 | 0.014 |  |  |        |        |       | 25.24  |      |
| N70  |   |       |       |       |       |         |        |      |       | 0.00   | 1 | 0.866 | 0.01  |  |  |        |        |       | 14.00  |      |
| P71  |   |       |       |       |       |         |        |      |       |        |   |       |       |  |  |        |        |       |        |      |
| K72  | 5 | 0.864 | 0.011 | 0.91  | 0.006 | 604.73  | 73.90  |      |       | 0.00   | 1 | 0.938 | 0.007 |  |  |        |        |       | 168.90 |      |
| K73  |   |       |       |       |       |         |        |      |       | 0.00   | 1 | 0.973 | 0.01  |  |  |        |        |       | 68.70  |      |
| Y74  |   |       |       |       |       |         |        |      |       |        | 2 | 0.967 | 0.009 |  |  | 640.38 | 248.45 |       | 3.43   |      |
| I75  | 1 | 0.839 | 0.005 |       |       |         |        |      |       | 20.02  | 1 | 0.885 | 0.01  |  |  |        |        |       | 6.31   |      |
| P76  |   |       |       |       |       |         |        |      |       |        |   |       |       |  |  |        |        |       |        |      |
| G77  | 2 | 0.942 | 0.011 |       |       | 26.75   | 8.22   |      |       | 0.51   | 3 | 0.928 | 0.03  |  |  |        | 10.58  | 0.55  | 0.10   |      |
| T78  | 2 | 0.95  | 0.005 |       |       | 6.80    | 2.35   |      |       | 0.54   | 2 | 0.968 | 0.018 |  |  | 16.45  | 573.32 |       | 0.02   |      |
| K79  | 1 | 0.968 | 0.009 |       |       |         |        |      |       | 12.84  | 1 | 1     | 0.015 |  |  |        |        |       | 10.36  |      |
| M80  |   |       |       |       |       |         |        |      |       | 0.00   | 1 | 1     | 0.022 |  |  |        |        |       | 43.79  |      |
| I81  | 1 | 0.975 | 0.019 |       |       |         |        |      |       | 14.74  | 1 | 1     | 0.024 |  |  |        |        |       | 1.33   |      |
| F82  | 2 | 0.869 | 0.013 |       |       | 64.81   | 9.83   |      |       | 0.13   | 2 | 0.905 | 0.028 |  |  | 40.05  | 47.83  |       | 0.21   |      |
| V83  | 2 | 0.922 | 0.019 |       |       | 50.69   | 62.58  |      |       | 0.19   | 2 | 0.927 | 0.029 |  |  | 48.75  | 186.35 |       | 2.85   |      |

|      |   |       |       |       |       |         |        |      |        |      |   |       |       |       |       |        |        |  |        |
|------|---|-------|-------|-------|-------|---------|--------|------|--------|------|---|-------|-------|-------|-------|--------|--------|--|--------|
| G84  |   |       |       |       |       |         |        |      |        |      | 1 | 0.812 | 0.027 |       |       |        |        |  | 14.76  |
| I85  | 1 | 0.894 | 0.003 |       |       |         |        |      | 2.98   |      | 1 | 0.888 | 0.009 |       |       |        |        |  | 2.19   |
| K86  | 1 | 0.938 | 0.016 |       |       |         |        |      | 111.60 |      | 1 | 0.921 | 0.023 |       |       |        |        |  | 44.69  |
| K87  | 5 | 0.873 | 0.007 | 0.929 | 0.004 | 585.97  | 48.83  |      | 0.00   |      | 5 | 0.83  | 0.017 | 0.912 | 0.016 | 826.59 | 156.86 |  | 0.00   |
| K88  | 1 | 1     | 0.006 |       |       |         |        |      | 1.64   |      | 1 | 0.971 | 0.02  |       |       |        |        |  | 0.71   |
| E89  | 2 | 0.985 | 0.003 |       |       | 114.70  | 102.66 |      | 0.19   |      | 1 | 0.964 | 0.015 |       |       |        |        |  | 0.88   |
| E90  | 1 | 0.922 | 0.004 |       |       |         |        |      | 97.22  |      | 1 | 0.869 | 0.011 |       |       |        |        |  | 23.07  |
| R91  | 1 | 0.93  | 0.004 |       |       |         |        |      | 15.87  |      | 1 | 0.92  | 0.01  |       |       |        |        |  | 4.30   |
| A92  | 1 | 0.952 | 0.004 |       |       |         |        |      | 4.50   |      | 1 | 0.939 | 0.013 |       |       |        |        |  | 3.28   |
| D93  | 1 | 0.943 | 0.006 |       |       |         |        |      | 12.38  |      | 1 | 0.96  | 0.012 |       |       |        |        |  | 3.83   |
| L94  | 1 | 0.947 | 0.003 |       |       |         |        |      | 10.14  |      | 1 | 0.934 | 0.01  |       |       |        |        |  | 0.46   |
| I95  | 3 | 0.936 | 0.004 |       |       |         |        | 1.19 | 0.13   | 4.09 | 1 | 0.97  | 0.01  |       |       |        |        |  | 1.72   |
| A96  | 1 | 0.949 | 0.002 |       |       |         |        |      | 90.83  |      | 1 | 0.937 | 0.014 |       |       |        |        |  | 48.13  |
| Y97  | 3 | 0.943 | 0.005 |       |       |         |        | 0.66 | 0.10   | 0.21 | 1 | 0.971 | 0.008 |       |       |        |        |  | 15.31  |
| L98  | 1 | 0.989 | 0.004 |       |       |         |        |      | 127.30 |      | 1 | 0.981 | 0.007 |       |       |        |        |  | 82.49  |
| K99  | 5 | 0.901 | 0.01  | 0.93  | 0.006 | 1463.40 | 167.09 |      | 0.00   |      | 1 | 0.938 | 0.009 |       |       |        |        |  | 106.60 |
| K100 | 1 | 0.921 | 0.002 |       |       |         |        |      | 58.80  |      | 1 | 0.916 | 0.007 |       |       |        |        |  | 7.50   |
| A101 | 4 | 0.939 | 0.005 |       |       | 18.75   | 1.89   | 3.42 | 0.10   | 0.00 | 1 | 1     | 0.005 |       |       |        |        |  | 141.50 |
| T102 | 1 | 0.889 | 0.007 |       |       |         |        |      | 2.78   |      | 1 | 0.878 | 0.016 |       |       |        |        |  | 18.93  |
| N103 |   |       |       |       |       |         |        |      | 0.00   |      |   |       |       |       |       |        |        |  | 0.00   |
| E104 | 2 | 0.894 | 0.009 |       |       | 180.05  | 58.89  |      | 0.00   |      | 2 | 0.814 | 0.018 |       |       | 60.71  | 32.56  |  | 0.15   |
